# Supplementary material for: Lactobacillus coryniformis subsp. torquens inhibits bone loss in obese mice via modification of the gut microbiota
Source: Royal Society of Chemistry journal article supplement (doi:10.1039/d2fo03863c), 2023-01-01
Supplement: d2fo03863c1.pdf [file d2fo03863c1.pdf]

Figure S1

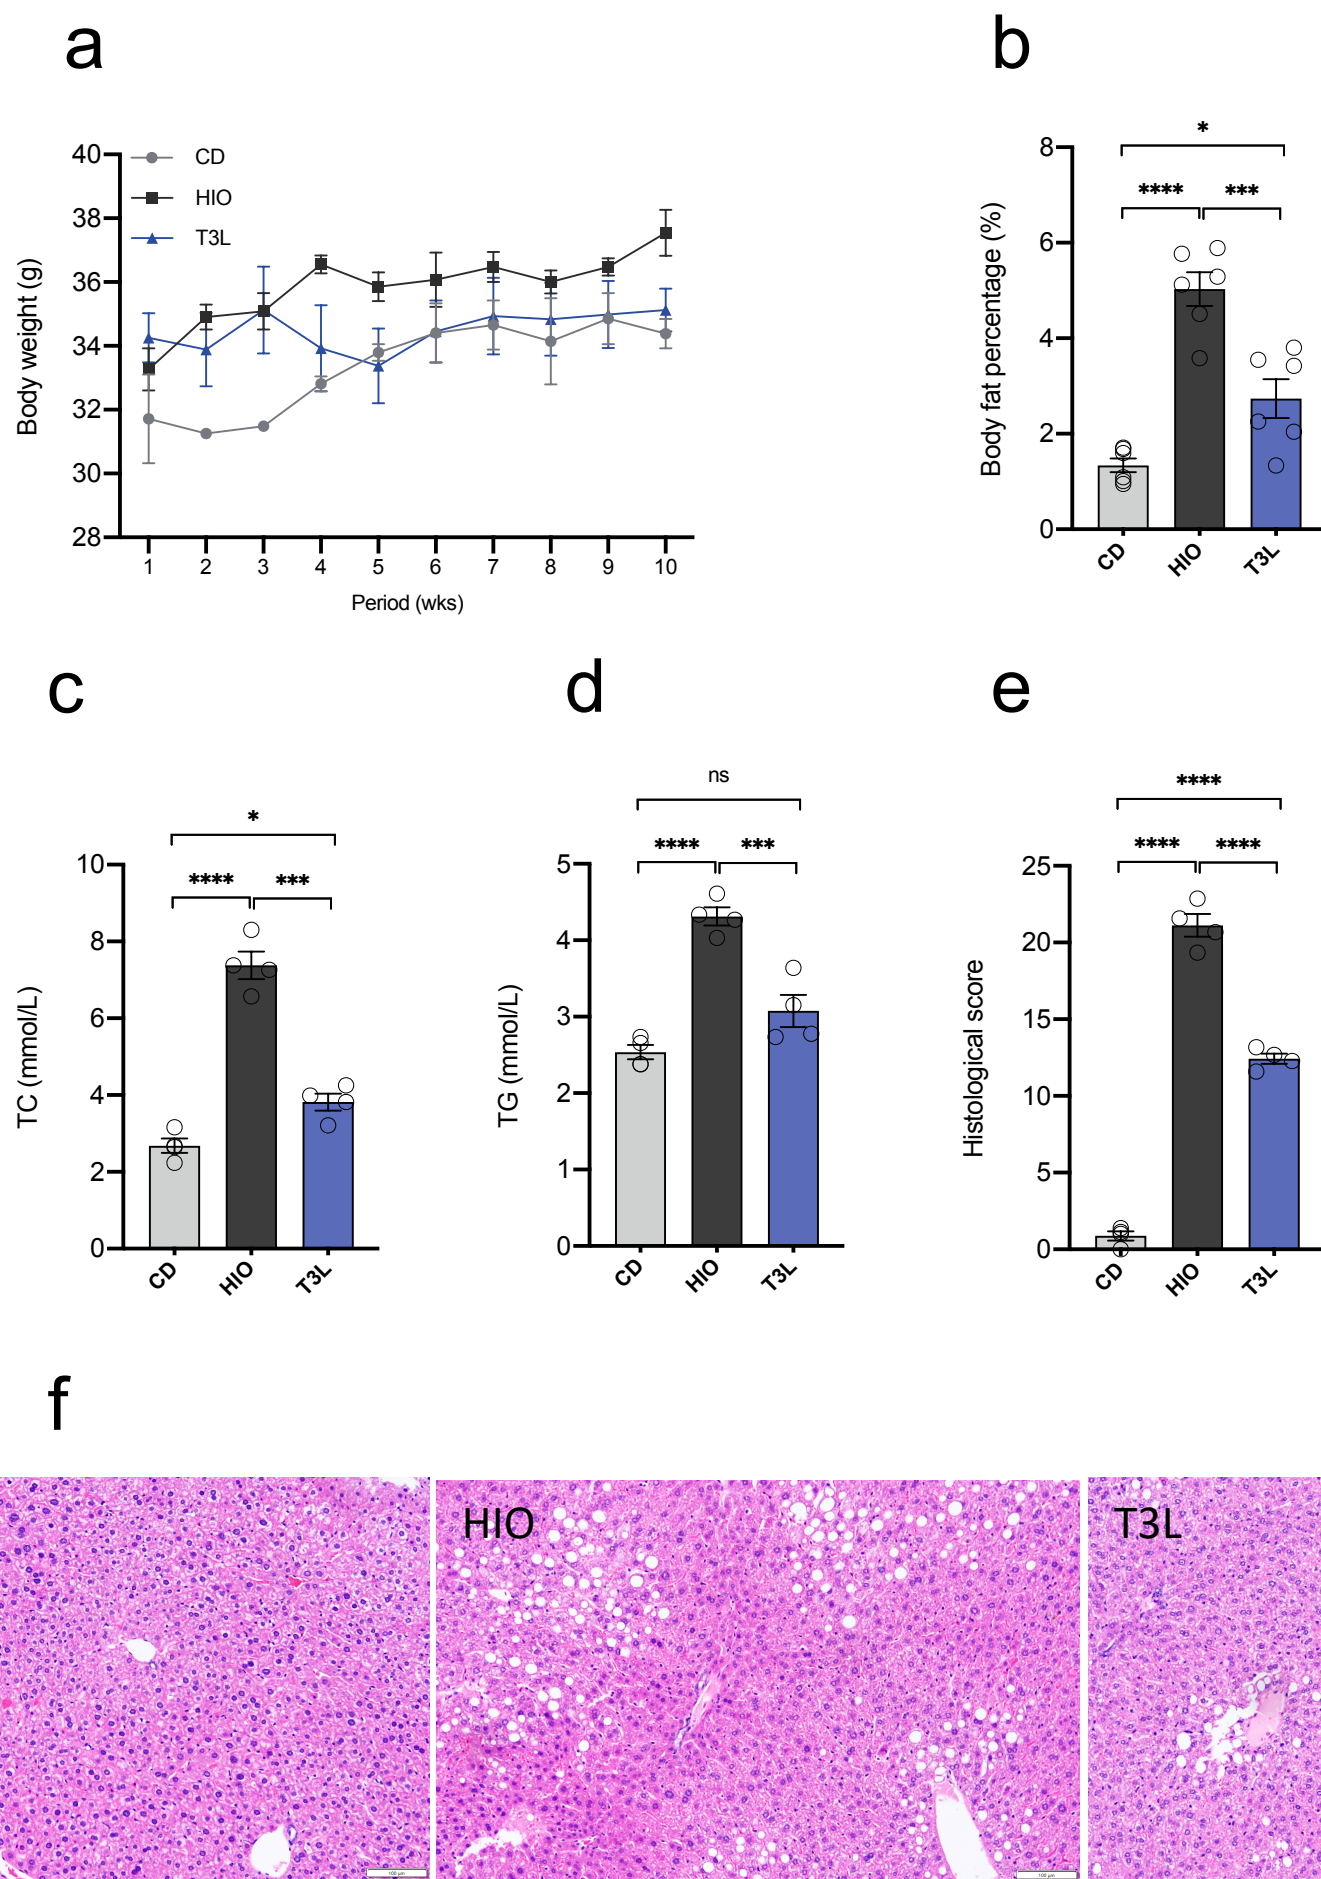

Figure S2

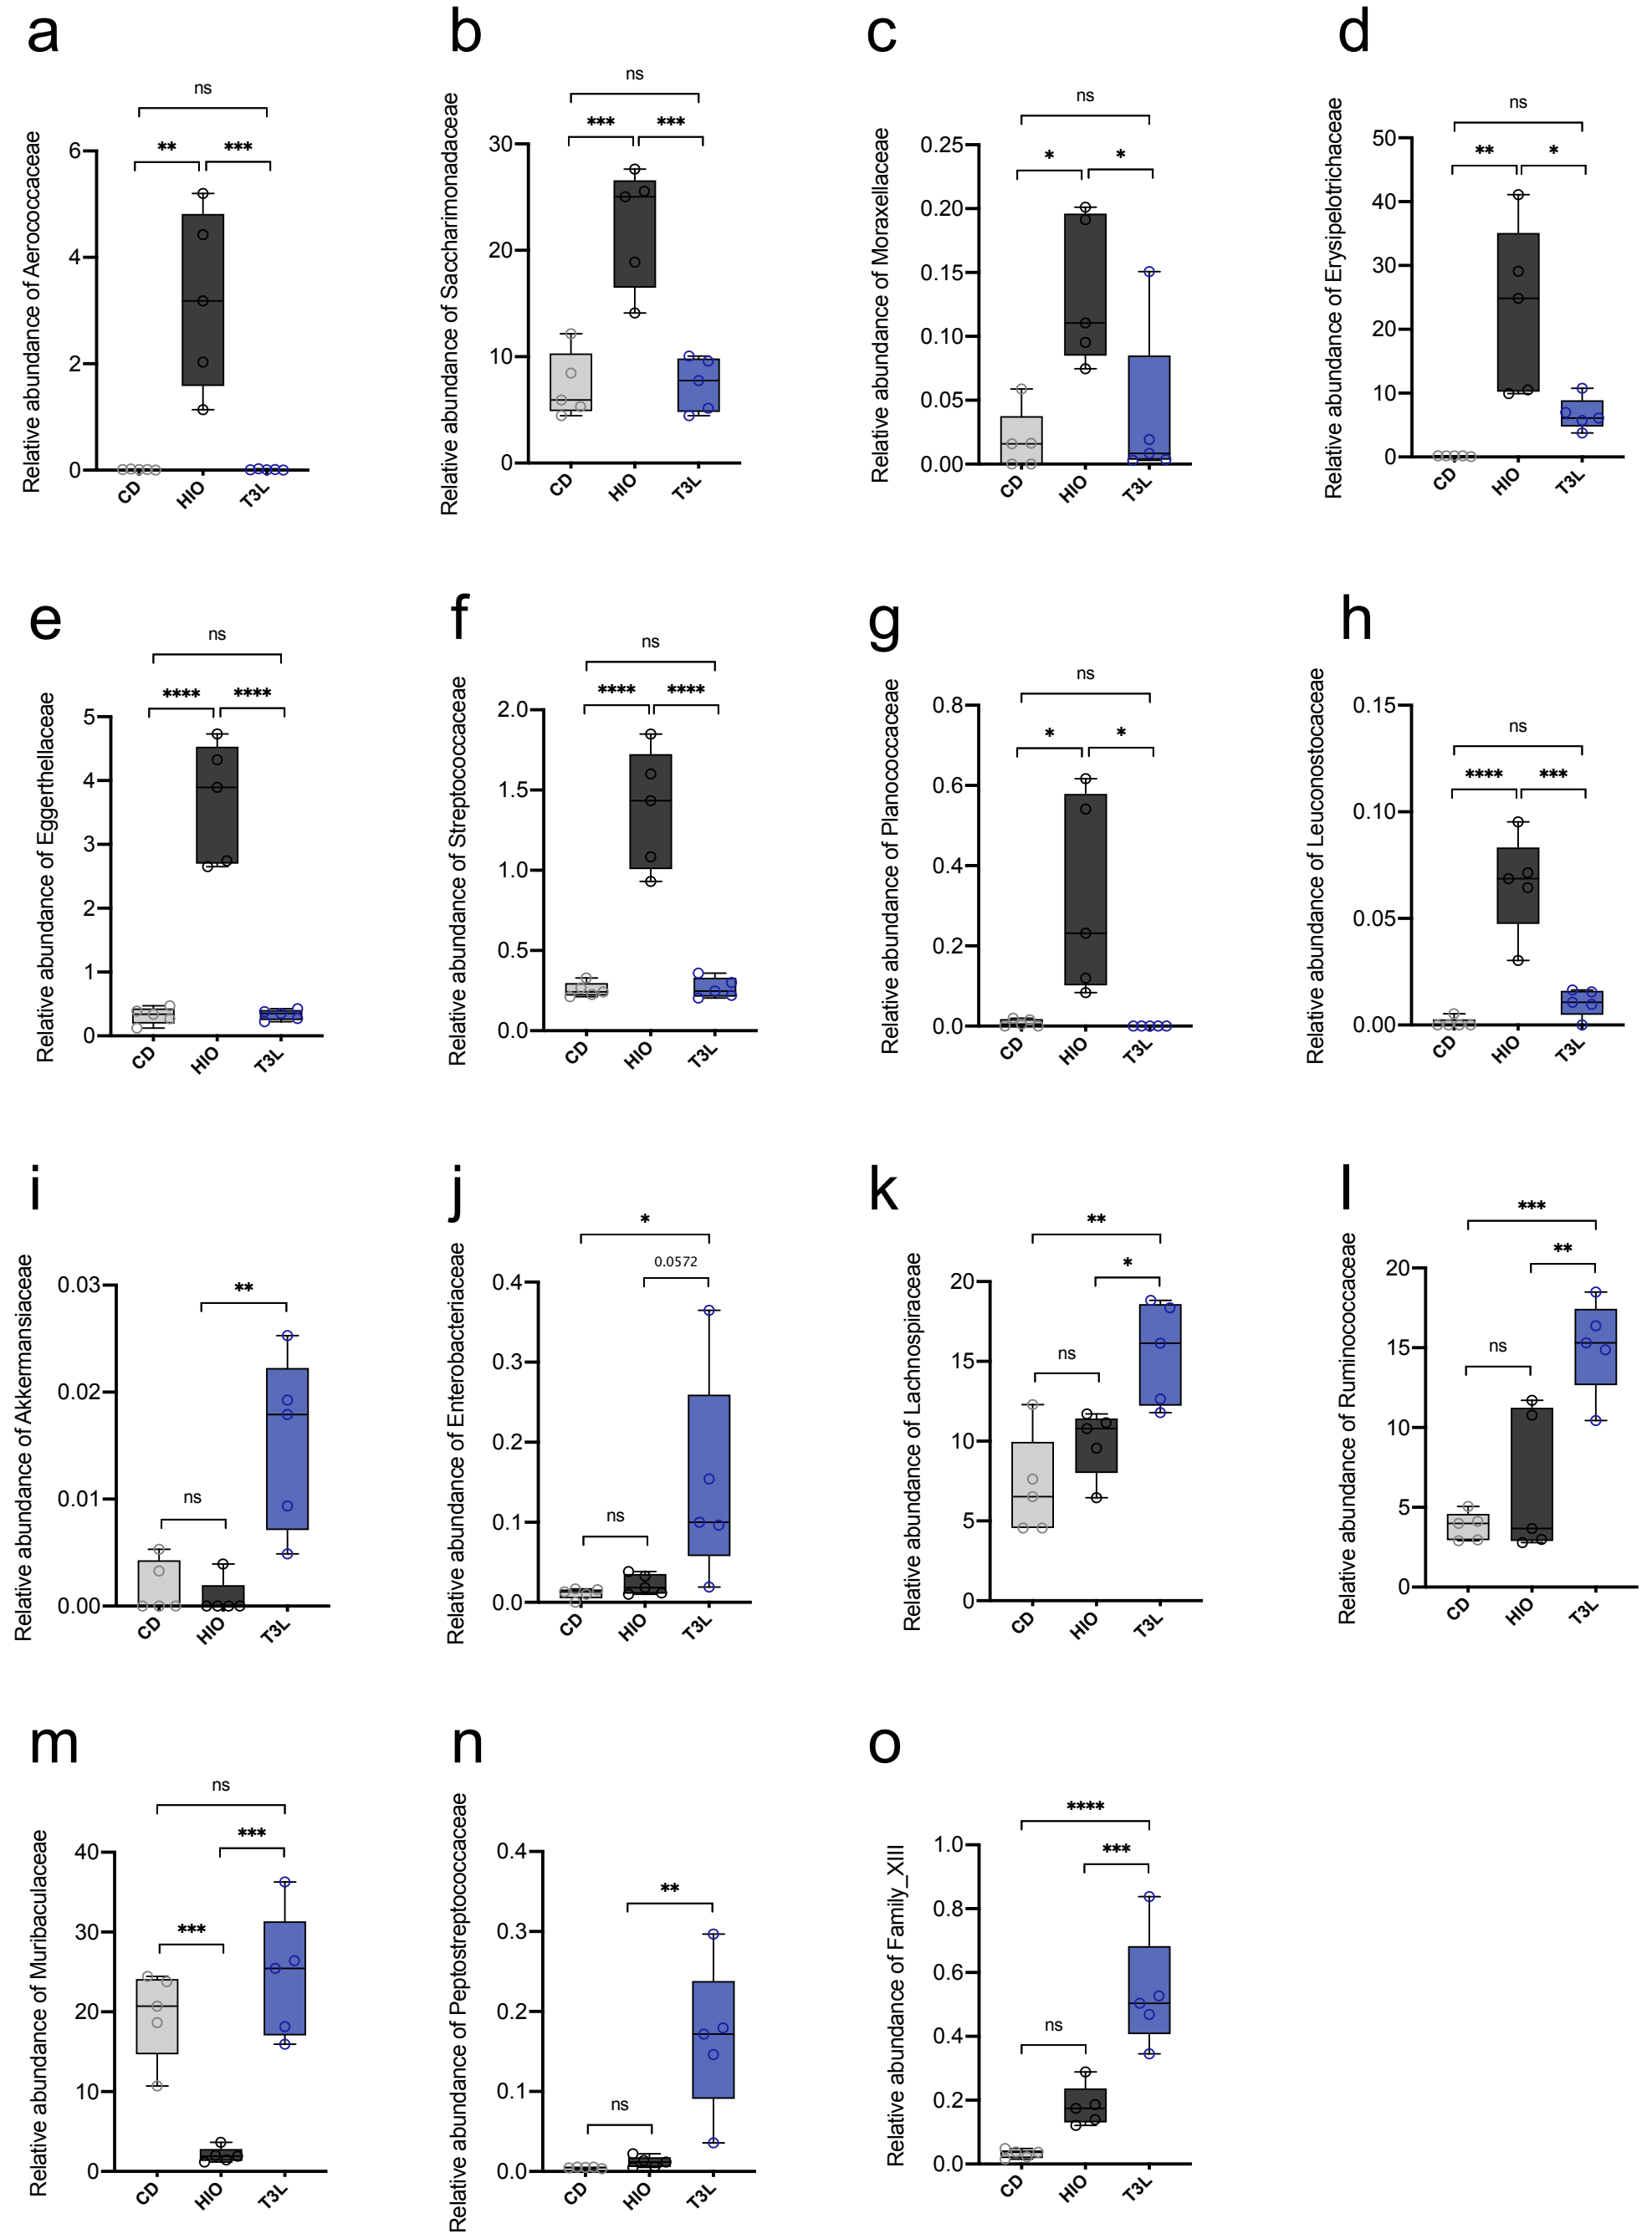

Figure S3

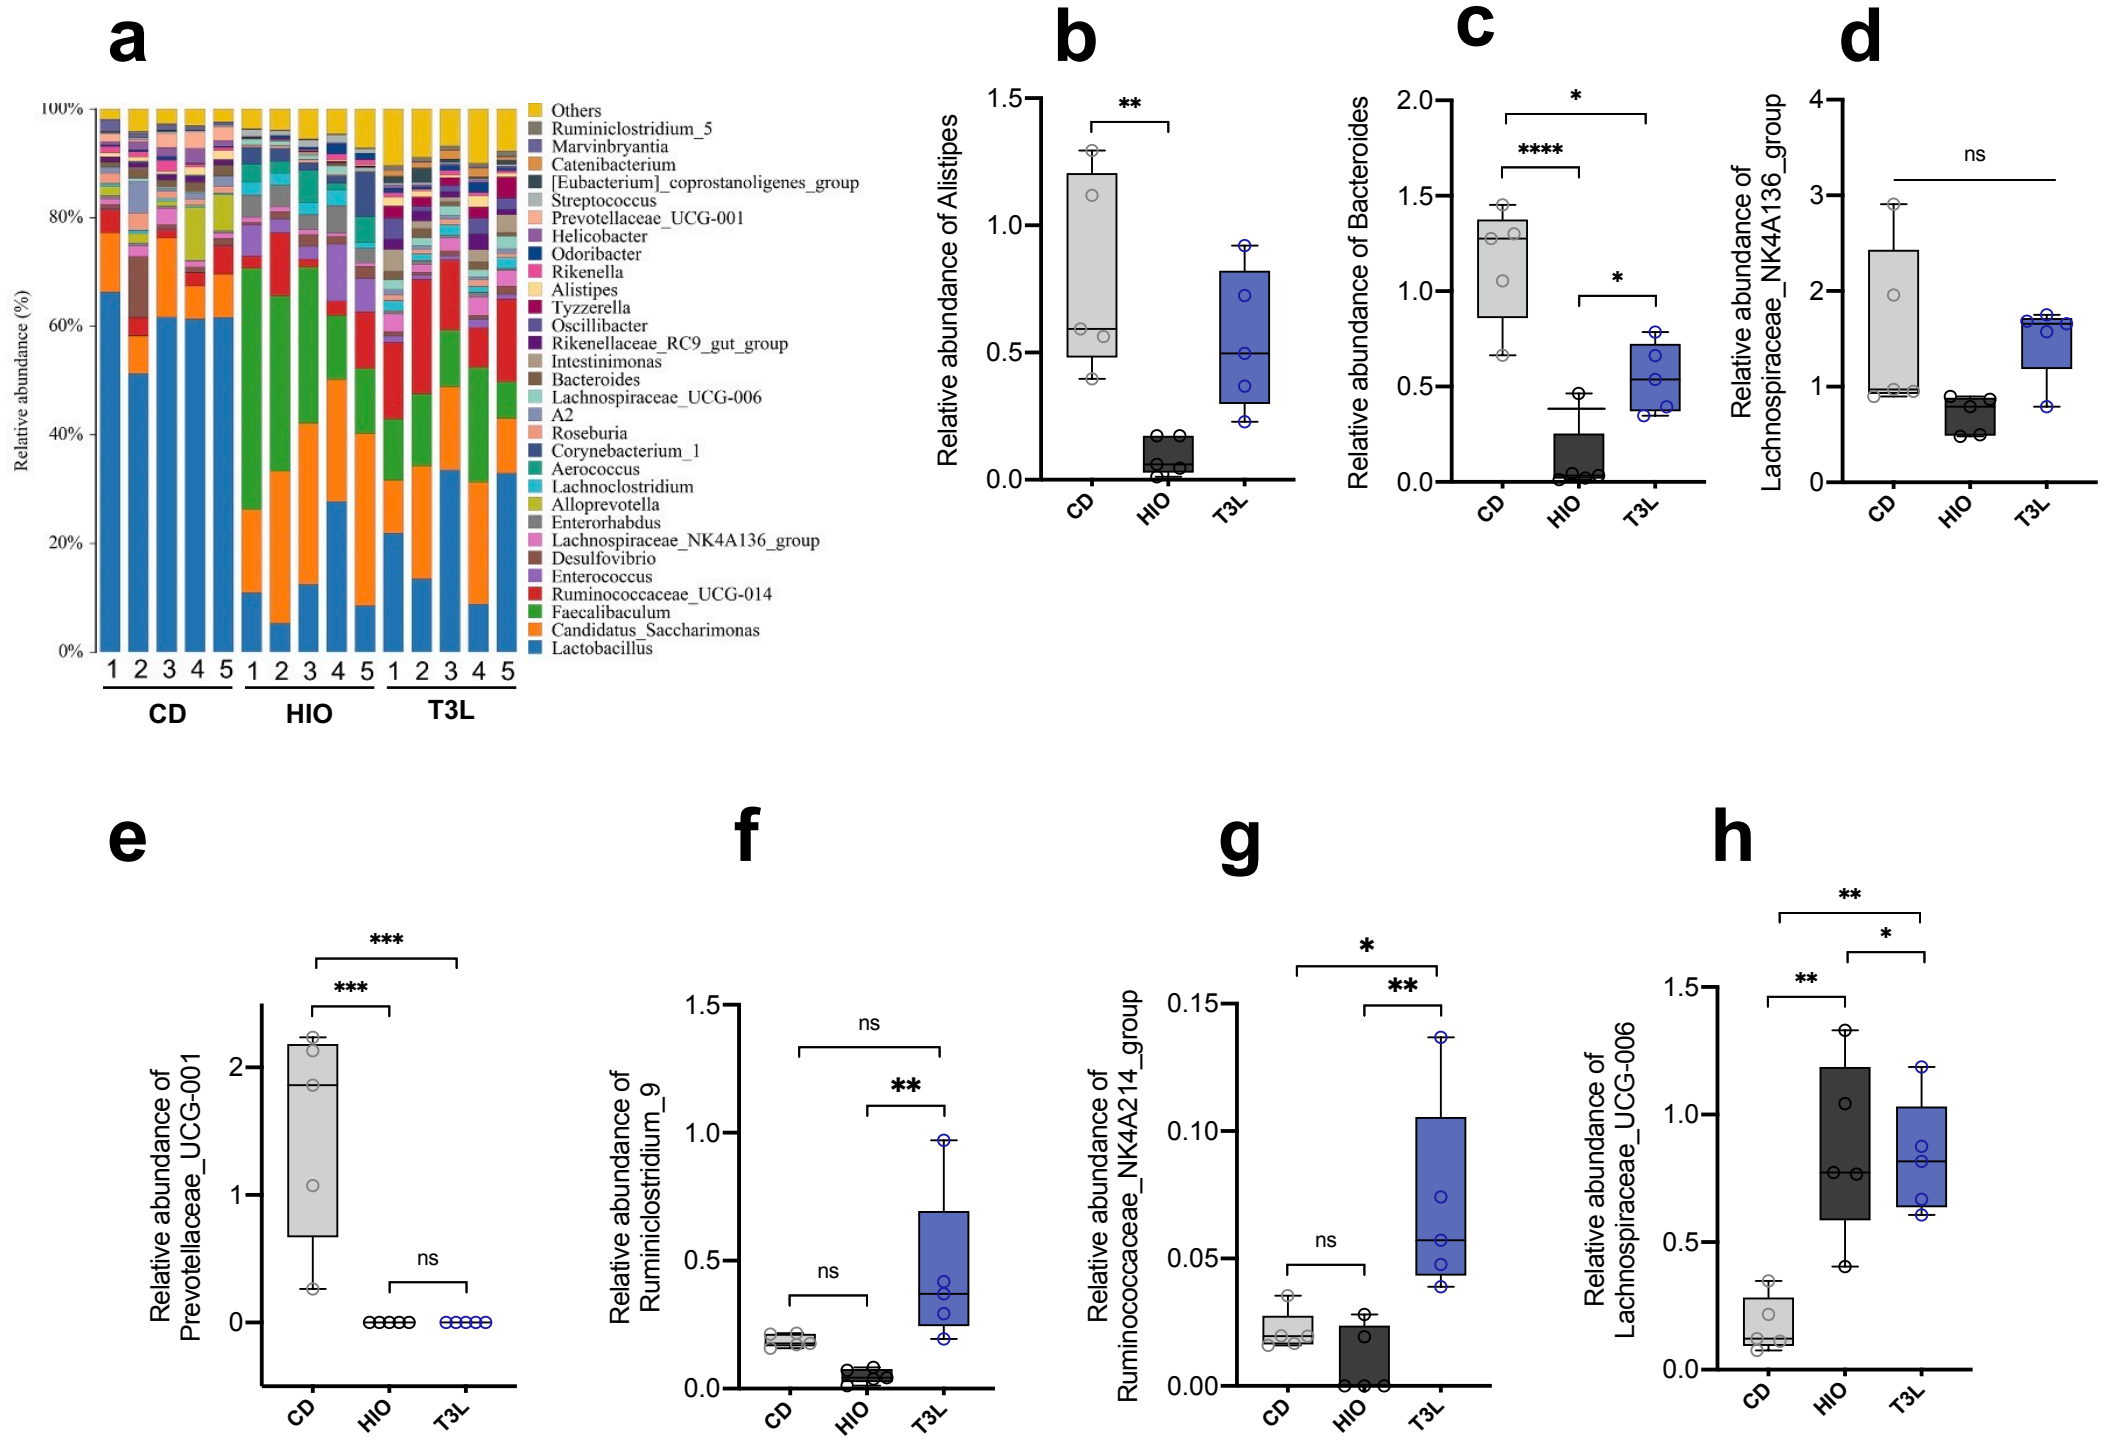

Figure S4

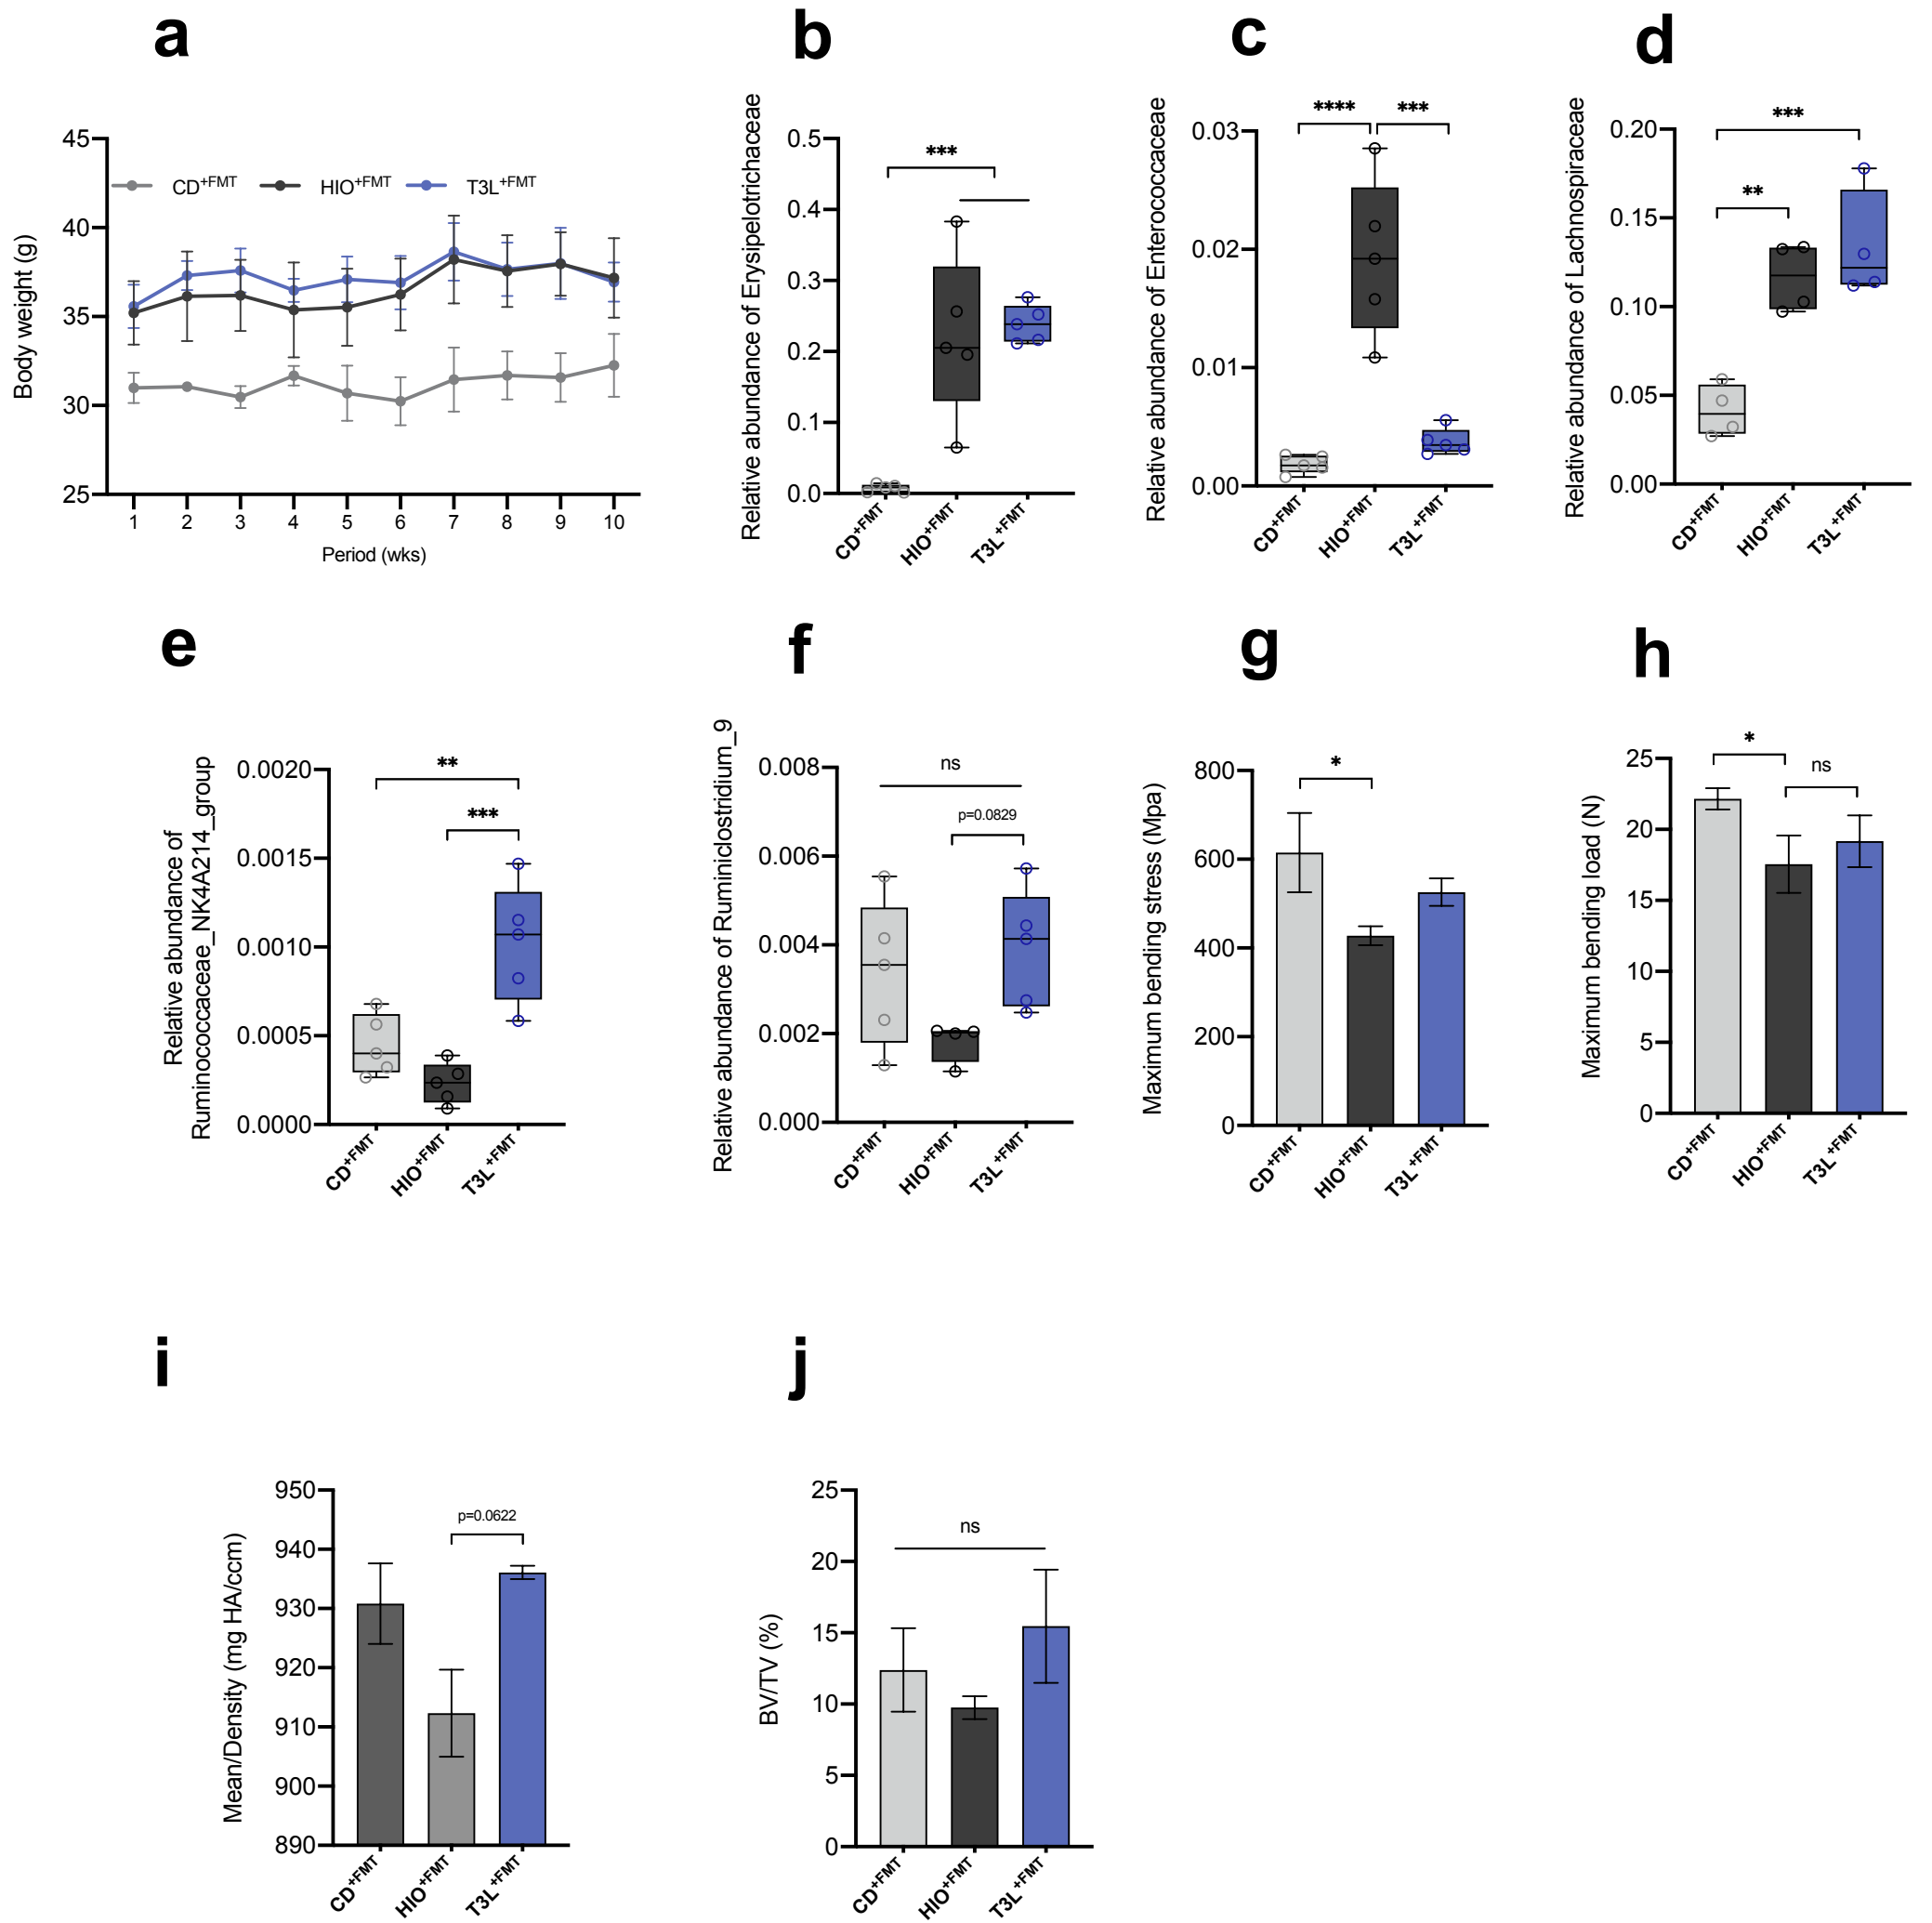

Figure S5

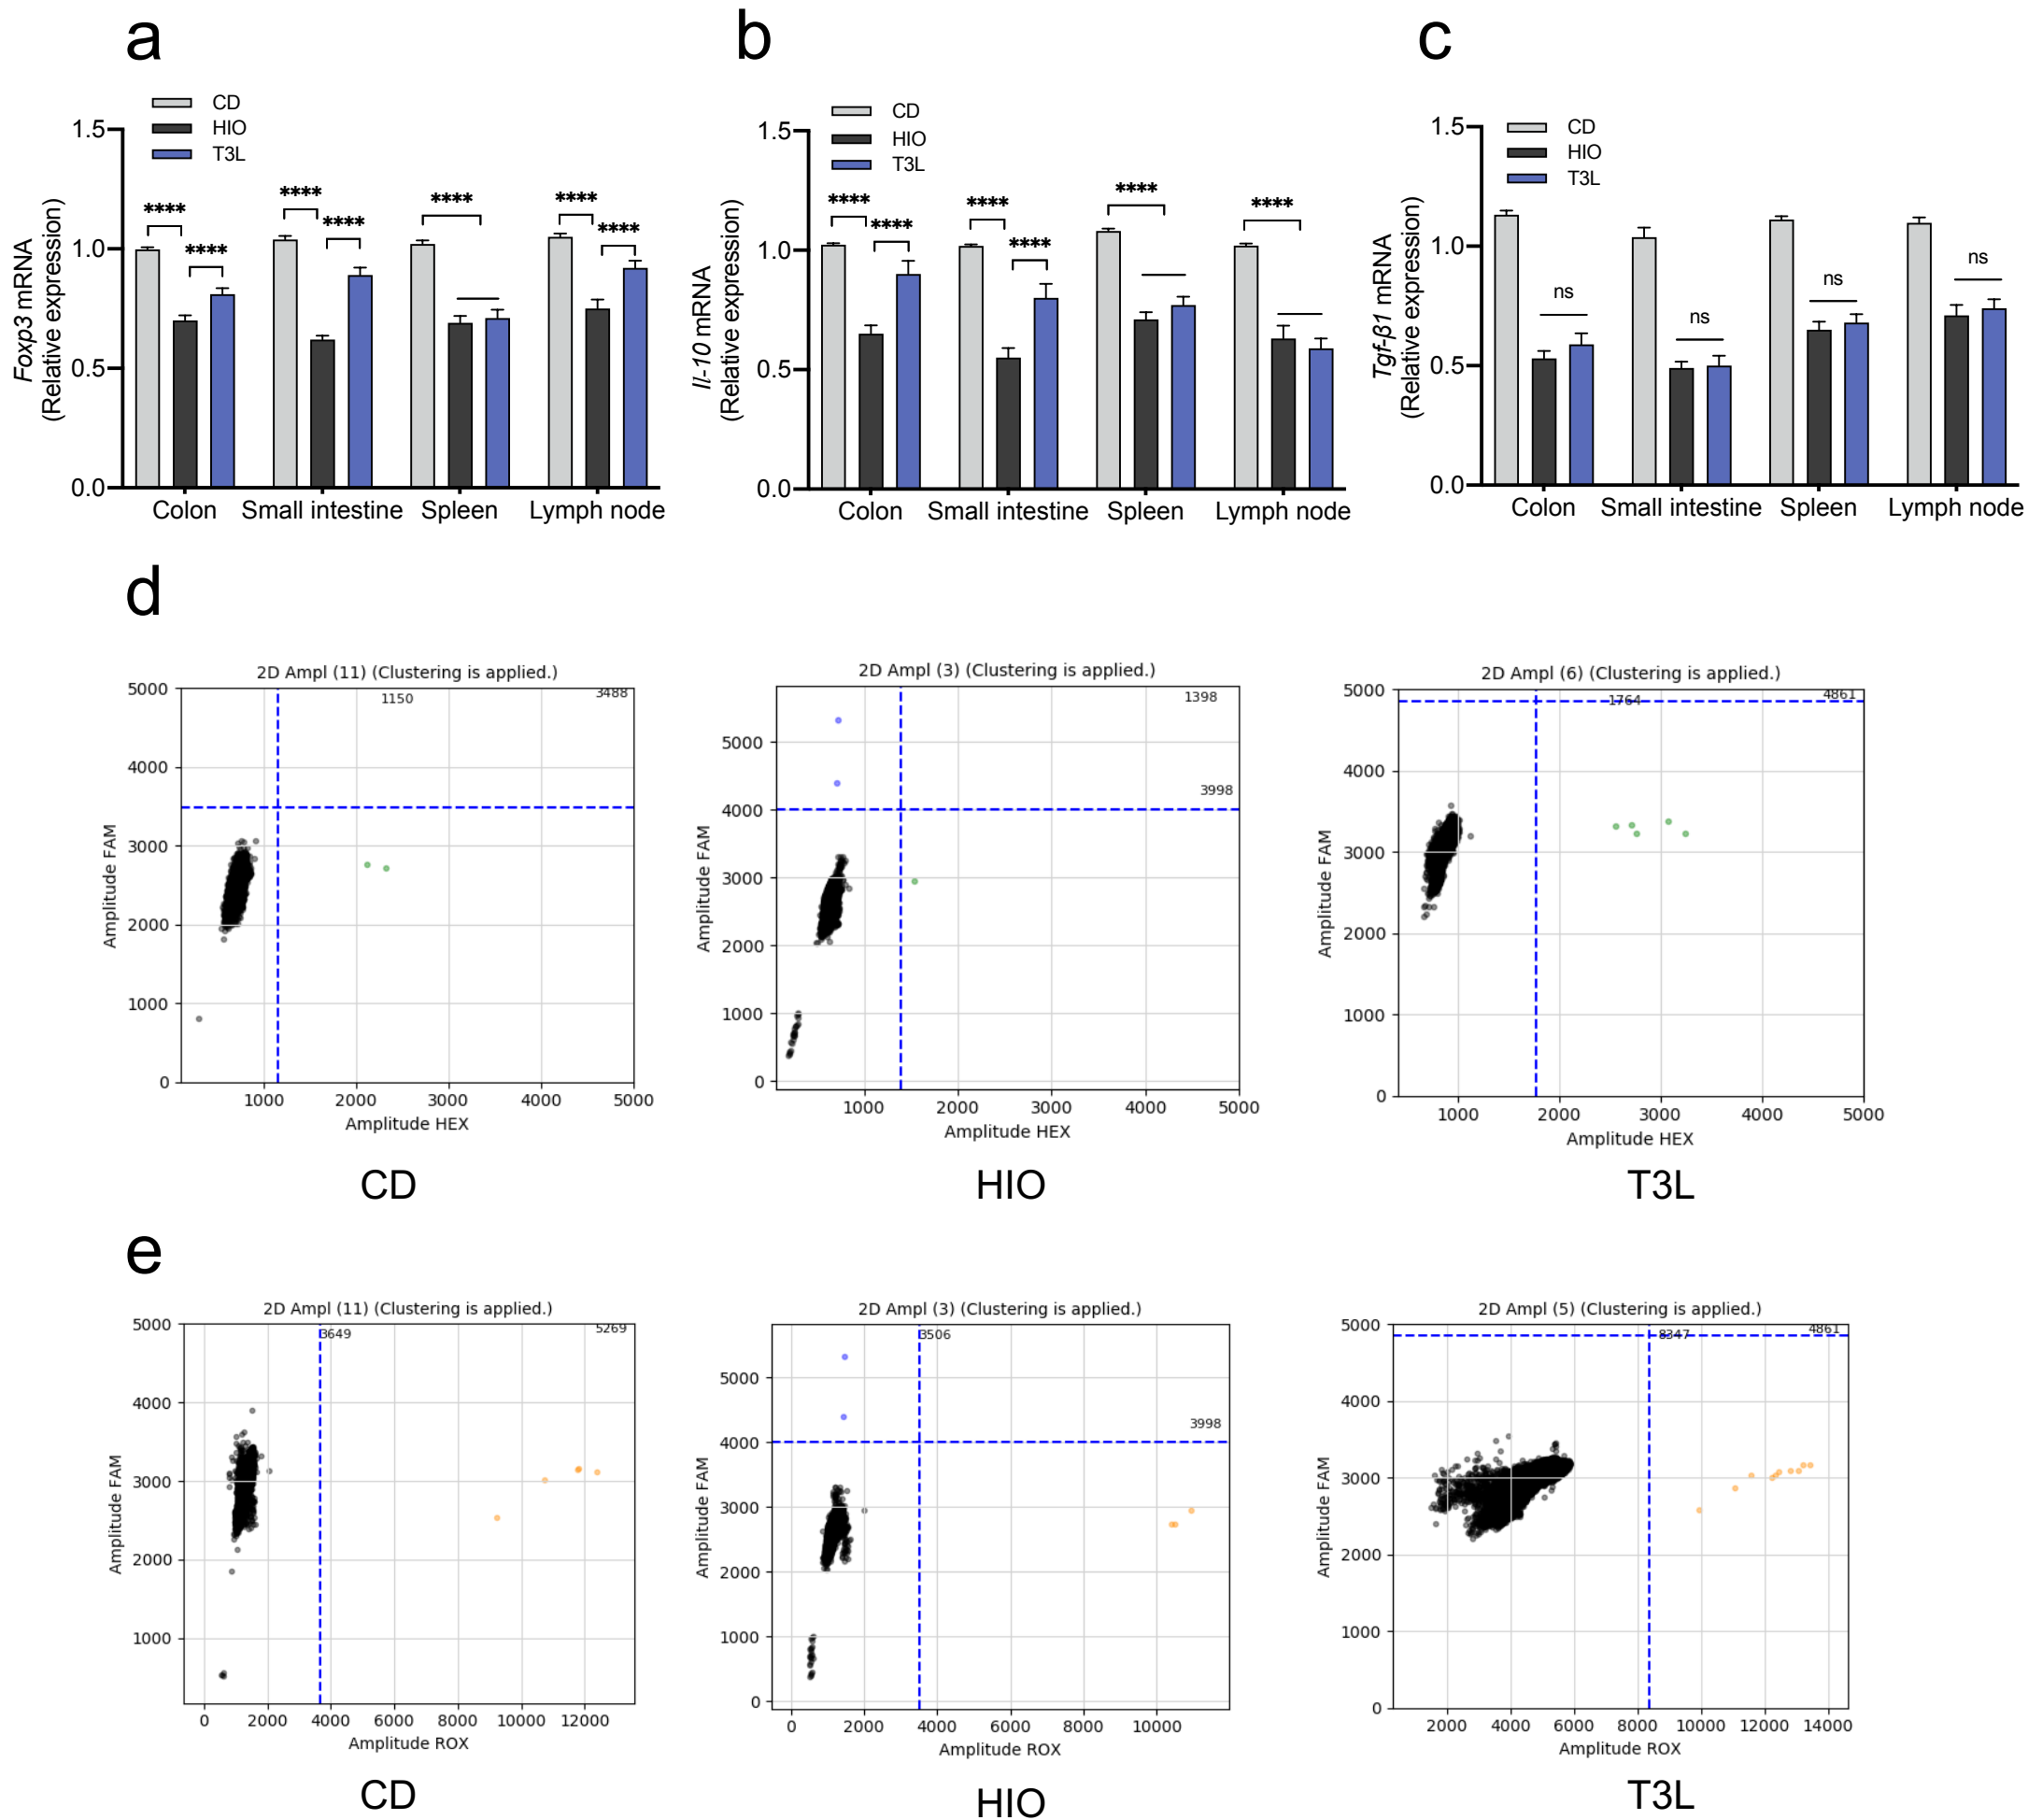



**Figure S1 T3L reduces fat accumulation in HFD-fed mice. Related to Figure 1.** (a) Effect of T3L treatment on body weight. (b) body weight percentage. (c) TC levels. (d) TG levels. (e) histologic score. (f) liver tissue. CD, chow diet; HFD, high-fat diet; TC, cholesterol; TG, triglyceride. Results determined by one-way ANOVA. Data are represented as the mean  $\pm$  SEM, n=3-6. ns: not significant, \* p<0.05, \*\*p<0.01, \*\*\*p<0.001, \*\*\*\*p<0.0001.

**Figure S2 T3L ameliorated HFD-induced gut microbiota in family level. Related to Figure 2.** (a) Related abundance of Aerococcaceae.(b) Related abundance of Saccharimonadaceae.(c) Related abundance of Moraxellaceae.(d) Related abundance of Erysipelotrichaceae.(e) Related abundance of Eggerthellaceae.(f) Related abundance of Streptococcaceae.(g) Related abundance of Planococcaceae.(h) Related abundance of Leuconostocaceae.(i) Related abundance of Akkermansiaceae.(j) Related abundance of Enterobacteriaceae.(k) Related abundance of Lachnospiraceae.(l) Related abundance of Ruminococcaceae.(m) Related abundance of Muribaculaceae.(n) Related abundance of Peptostreptococcaceae.(o) Related abundance of Family\_XIII.

**Figure S3 Relative abundance of genera regulated by T3L. Related to Figure 2.** (a)Heatmap displaying genera in CD, HIO and T3L groups. (b) Relative abundance of *Alistipes*. (c) Relative abundance of *Bacteroides*. (d) Relative abundance of *Lachnospiraceae\_NK4A136\_group*. (e) Relative abundance of *Prevotellaceae\_UCG-001*. (f) Relative abundance of *Ruminiclostridium\_9*. (g) Relative abundance of *Ruminococcaceae\_NK4A214\_group*. (h) Relative abundance of *Lachnospiraceae\_UCG-006*.

**Figure S4 T3L prevents HFD-induced bone loss through SCFAs mediated gut microbiota.** (a) Body weight changes during 10 weeks fecal transplantation. (b) Relative abundance of Erysipelotrichaceae. (c) Relative abundance of Enterococcaceae. (d) Relative abundance of *Lachnospiraceae*. (e) Relative abundance of *Ruminococcaceae\_NK4A214\_group*. (f) Relative abundance of *Ruminiclostridium\_9*. (g) Maximum bending stress. (h) Maximum bending load. (i) Mean/Density. (j) BV/TV.

**Figure S5 Tregs relative cytokines expression in colon tissues and cells.** (a) Relative mRNA expression of *Foxp3*. (b) Relative mRNA expression of *Il-10*. (c) Relative mRNA expression of *Tgf- $\beta$* . (d-e) number of gene copies of IL-10 and TGF- $\beta$ .

1 **Table S1.** Gene primer sequences

| Gene            |   | Primer sequence (5'-3')       |
|-----------------|---|-------------------------------|
| RANKL           | F | 5'- TCACTCTGTCCTCTTGGTA -3'   |
|                 | R | 5'- CGCTTCCCGATGTTTCA -3'     |
| OPG             | F | 5'- GAGAGTGAGGCAGGCTAT -3'    |
|                 | R | 5'- TGTGAGGAGAGGAAGGAAG -3'   |
| TRAP            | F | 5'- CACTCCCACCCTGAGATTTGT -3' |
|                 | R | 5'- CATCGTCTGCACGGTTCTG -3'   |
| Coll $\alpha$ 1 | F | 5'- ACGTCCTGGTGAAGTTGGTC -3'  |
|                 | R | 5'- TCCAGCAATACCCTGAGGTC -3'  |
| CTSK            | F | 5'- TTGTGACCGTGATAATGTGA -3'  |
|                 | R | 5'- GCAGGCGTTGTTCTTATTC -3'   |
| Foxp3           | F | 5'- GCAGAGAGGTATTGAGGGTGG -3' |
|                 | R | 5'- CCACAGCATGGGTCTGTCTTC -3' |
| IL-10           | F | 5'- CCAAGCCTTATCGGAAATGA -3'  |
|                 | R | 5'- TCCTGAGGGTCTTCAGCTTC -3'  |
| TGF- $\beta$    | F | 5'- CAATTCCTGGCGTTACCTTG -3'  |
|                 | R | 5'- AGCCCTGTATTCCGTCTCCT -3'  |
| Ffar2           | F | 5'- GGCTTCTACAGCAGCATCTA -3'  |
|                 | R | 5'- AAGCACACCAGGAAATTAAG -3'  |
| HDAC2           | F | 5'-CTATCCCGCTCTGTGCCCTA-3'    |
|                 | R | 5'-CCTCCTTGACTGTACGCCAT-3'    |
| HDAC7           | F | 5'-CTTTCTCAGGCTGCTCTCCC -3'   |
|                 | R | 5'-AGGGCTATGGAGGTGCATCA -3'   |
| HDAC9           | F | 5'- GCGGTCCAGGTAAAAACAGAA-3'  |
|                 | R | 5'- GCCACCTCAAACACTCGCTT-3'   |
| P300            | F | 5'- ACCACCACCAGCAACA -3'      |
|                 | R | 5'- AAGGAGCAGCAGGAAGT -3'     |
| CREBBP          | F | 5'- CTGAGATGATGGAAGAGGATT -3' |
|                 | R | 5'- GAAGGAGATGTTGATTGTGAG -3' |



---

| Gene | Primer sequence (5'-3') |                                |
|------|-------------------------|--------------------------------|
| PCAF | F                       | 5'- ATGAGTCCTGAAATGGCAGAGG -3' |
|      | R                       | 5'- CAAGTGAGAAACGTGAGCAGC -3'  |

---

2

3

4 **Table S2.** Antibodies and buffers used in flow cytometry

5

| Item No. | Antibodies and buffers                                    |           | Company   |
|----------|-----------------------------------------------------------|-----------|-----------|
| 421002   | Intracellular Staining Permeabilization Wash Buffer (10X) | 100 mL    | Biolegend |
| 420801   | Fixation Buffer                                           | 100 mL    | Biolegend |
| 424401   | True-Nuclear™ Transcription Factor Buffer Set             | 120 tests | Biolegend |
| 100510   | FITC anti-mouse CD4                                       | 500 µg    | Biolegend |
| 101903   | PE anti-mouse CD25                                        | 25 µg     | Biolegend |
| 126407   | Pacific Blue anti-mouse FOXP3                             | 25 µg     | Biolegend |
| 100306   | FITC anti-mouse CD3                                       | 500 µg    | Biolegend |
| 100408   | PE anti-mouse CD4                                         | 200 µg    | Biolegend |
| 100712   | APC anti-mouse CD8a                                       | 100 µg    | Biolegend |
| 100510   | FITC anti-mouse CD4                                       | 500 µg    | Biolegend |
| 101903   | PE anti-mouse CD25                                        | 25 µg     | Biolegend |

6

7

8

9

10

11 **Table S3.** Reference genomes for Mm Foxp3, Mm IL-10 and Mm TGF-beta

12 Mm Foxp3 Reference genome.

13 >NC\_000086.8 Mus musculus strain C57BL/6J chromosome X, GRCm39

14

|                            |                           |
|----------------------------|---------------------------|
| MM Foxp3 Forward Primer F1 | CGAAAGTGGCAGAGAGGTATT     |
| MM Foxp3 Probe P1          | CCCAGCCACTCCAGACAGAAGAAA  |
| MM Foxp3 Reverse Primer R1 | GCATGGGTCTGTCTTCTCTAAG    |
| MM Foxp3 Forward Primer F2 | CTATGCCACCCTTATCCGATG     |
| MM Foxp3 Probe P2          | TTTCATTGAGTGTCTCTGCCTCTCC |
| MM Foxp3 Reverse Primer R2 | TGGTTTCTGAAGTAGGCGAAC     |

15

16 **Mm IL10 reference genome**

17 >NC\_000067.7 Mus musculus strain C57BL/6J chromosome 1, GRCm39

18

|                           |                              |
|---------------------------|------------------------------|
| MM IL10 Forward Primer F1 | TTGAATTCCCTGGGTGAGAAG        |
| MM IL10 Probe P1          | TGAGGCGCTGTCATCGATTTCTCC     |
| MM IL10 Reverse Primer R1 | TCCACTGCCTTGCTCTTATTT        |
| MM IL10 Forward Primer F2 | AACATACTGCTAACCGACTCC        |
| MM IL10 Probe P2          | AACCCAAGTAACCCTTAAAGTCCTGCAT |
| MM IL10 Reverse Primer R2 | CATTTCCGATAAGGCTTGGC         |

19

20 **Mm TGF-beta reference genome**

21 >NC\_000073.7 Mus musculus strain C57BL/6J chromosome 7, GRCm39

22

|                           |                            |
|---------------------------|----------------------------|
| MM TGFB Forward Primer F1 | AGAGCCCTGGATACCAACTA       |
| MM TGFB Probe P1          | AGCTCCACAGAGAAGAAGACTGCTGT |
| MM TGFB Reverse Primer R1 | CAACCCAGGTCCTTCCTAAAG      |
| MM TGFB Forward Primer F2 | CTATGCTAAAGAGGTCACCCG      |
| MM TGFB Probe P2          | TTCATAGATGGCGTTGTTGCGGT    |
| MM TGFB Reverse Primer R2 | TCCCGAATGTCTGACGTATTG      |

23

24

25

26

27

28

29
